# Supplementary material for: Prevalence of and risk factors for non-alcoholic fatty liver disease (NAFLD) and fibrosis among young adults in Egypt
Source: PubMed Central journal article supplement — BMJ Open Gastroenterol. 2021 Oct 5;8(1):e000780. doi: 10.1136/bmjgast-2021-000780 (PMC8493908; doi:10.1136/bmjgast-2021-000780), 2021-10-05
Supplement: bmjgast-2021-000780supp001.pdf [file bmjgast-2021-000780supp001.pdf]

Supplemental table 1. Exposures associated with having fibrosis

|                   | Subjects with fibrosis | Crude OR (95% CI) | P value | Adjusted for                                     | Adjusted OR (95% CI) | P value |
|-------------------|------------------------|-------------------|---------|--------------------------------------------------|----------------------|---------|
| <b>BMI</b>        | NA                     | NA                | NA      | NA                                               | NA                   | NA      |
| Lean <sup>a</sup> | 1/61 (1.6%)            | Reference         | NA      | Smoking, parental education, exercise, fast food | Reference            | NA      |
| Overweight        | 4/28 (14.3%)           | 9.9 (1.06-94.1)   | 0.04    | NA                                               | 8.77 (0.9-86.5)      | 0.063   |
| Obese             | 1/31 (3.2%)            | 2 (0.12-33.1)     | 0.6     | NA                                               | 2.06 (0.11-38.7)     | 0.6     |

OR, odds ratio; NA, not applicable; BMI, body mass index. <sup>a</sup>BMI<25.
